# Supplementary material
Source: PubMed Central journal article supplement (PMC4543267)
Supplement: NIHMS534261-supplement-1.pdf [file NIHMS534261-supplement-1.pdf]

# R V Y I H P F

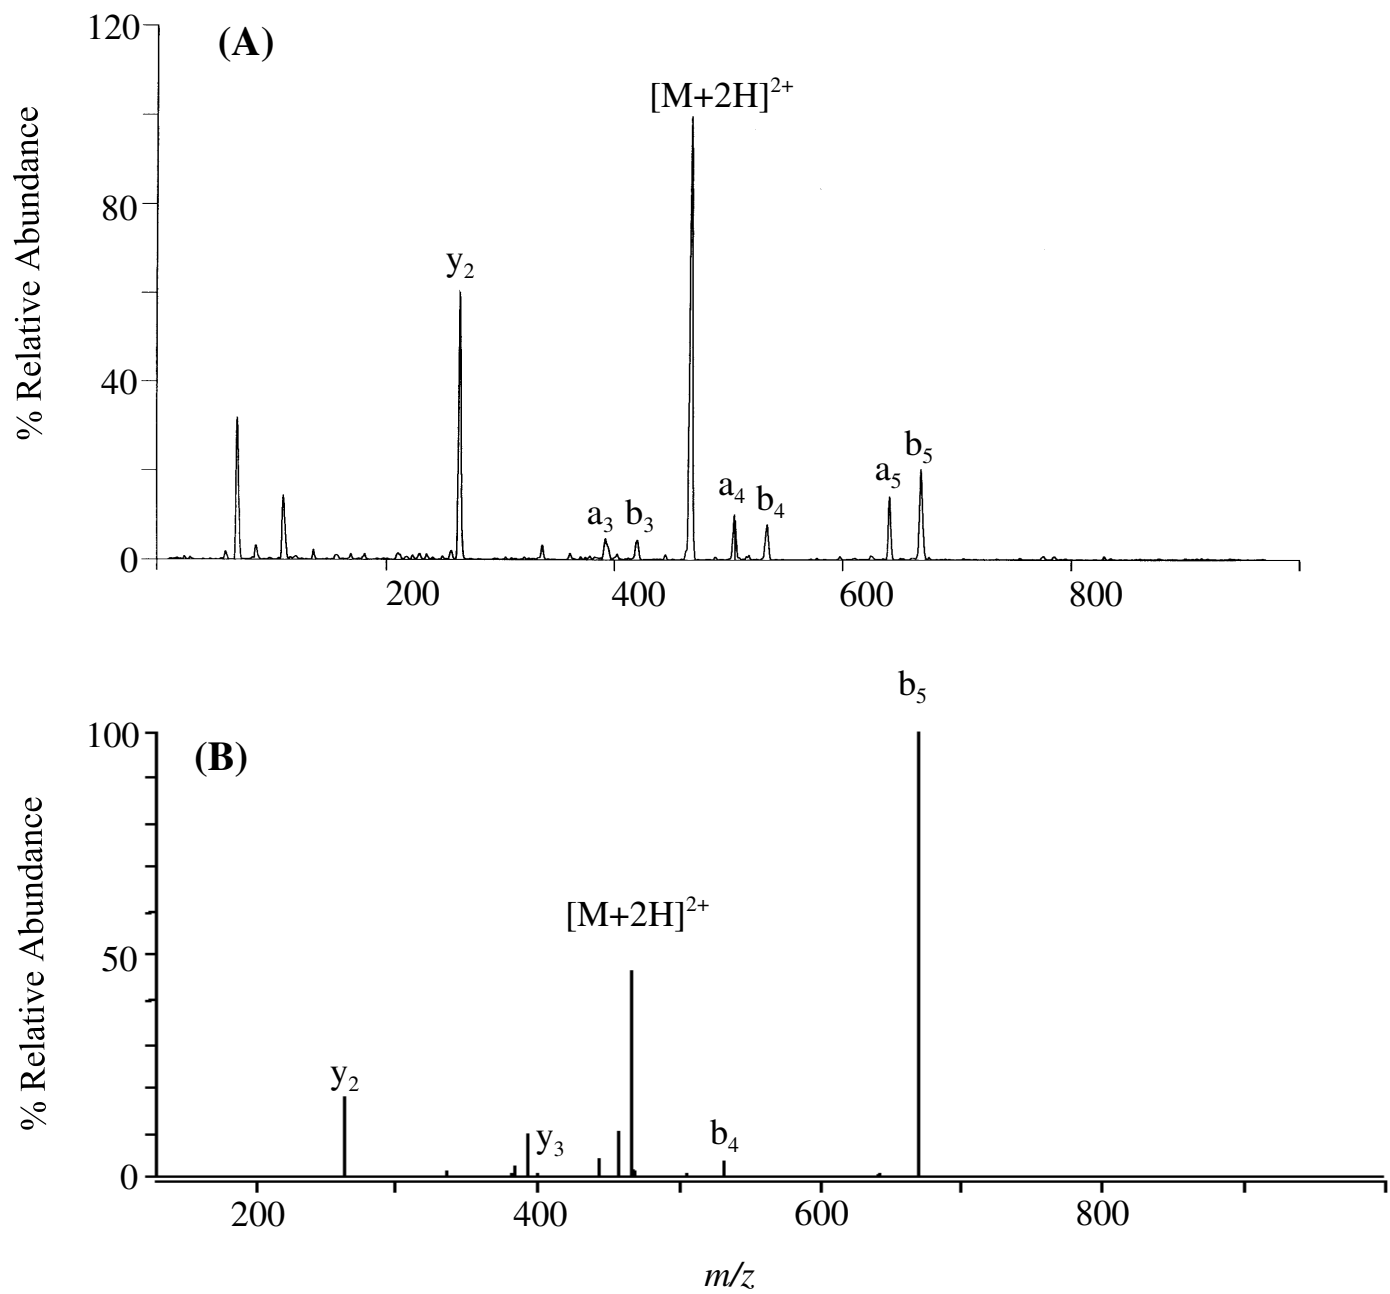

Supplemental Figure 1

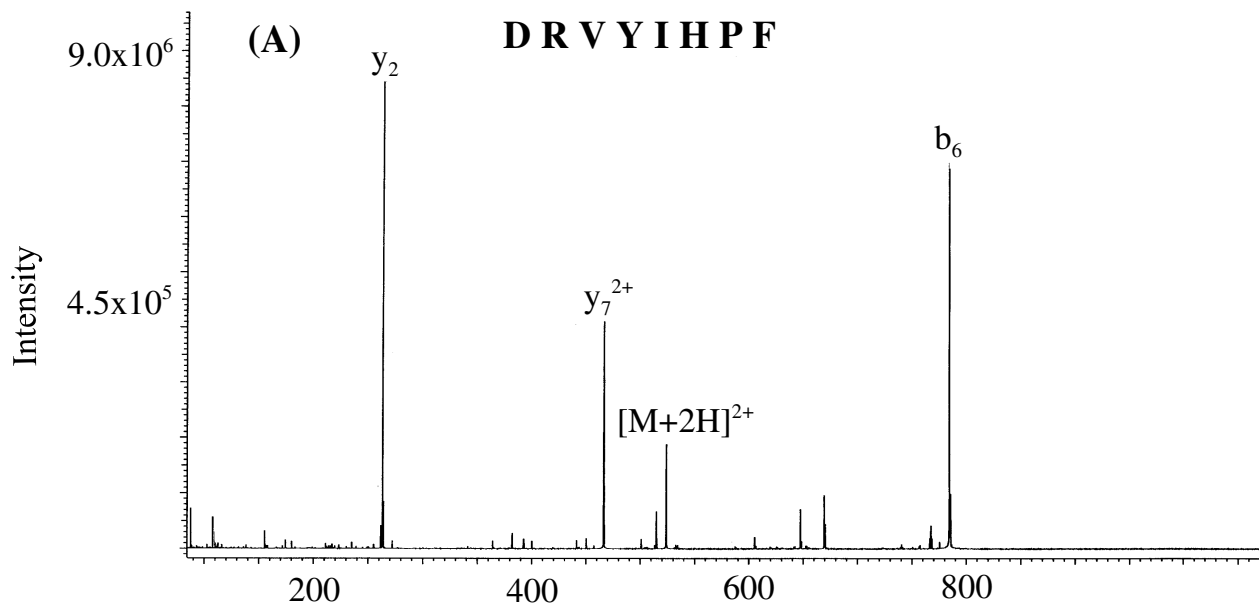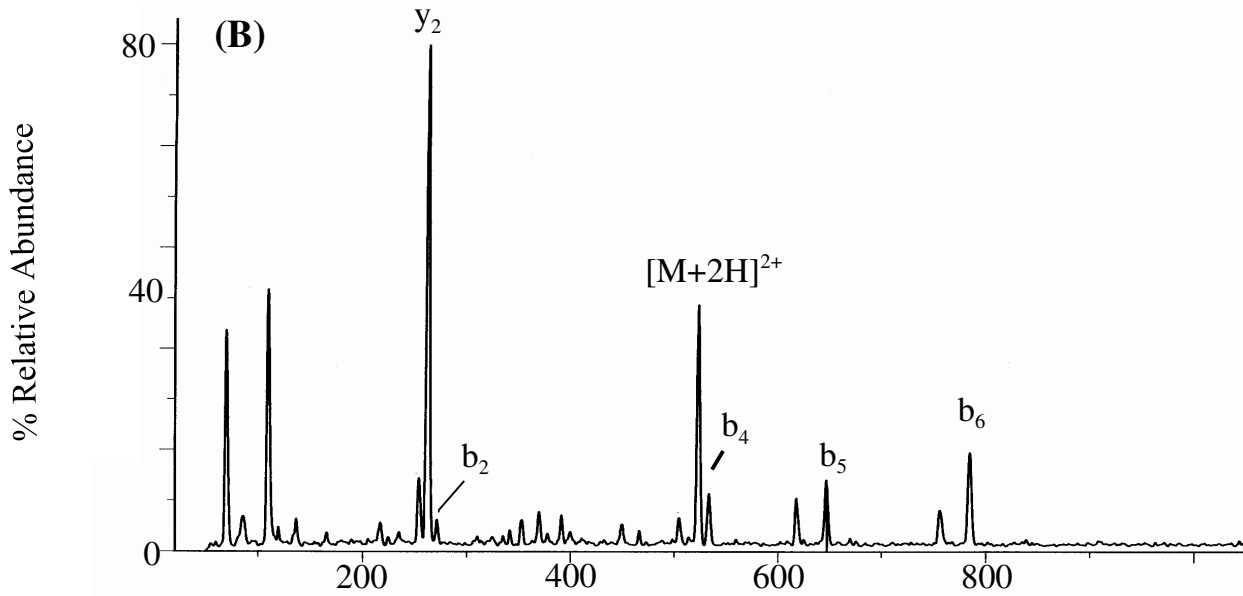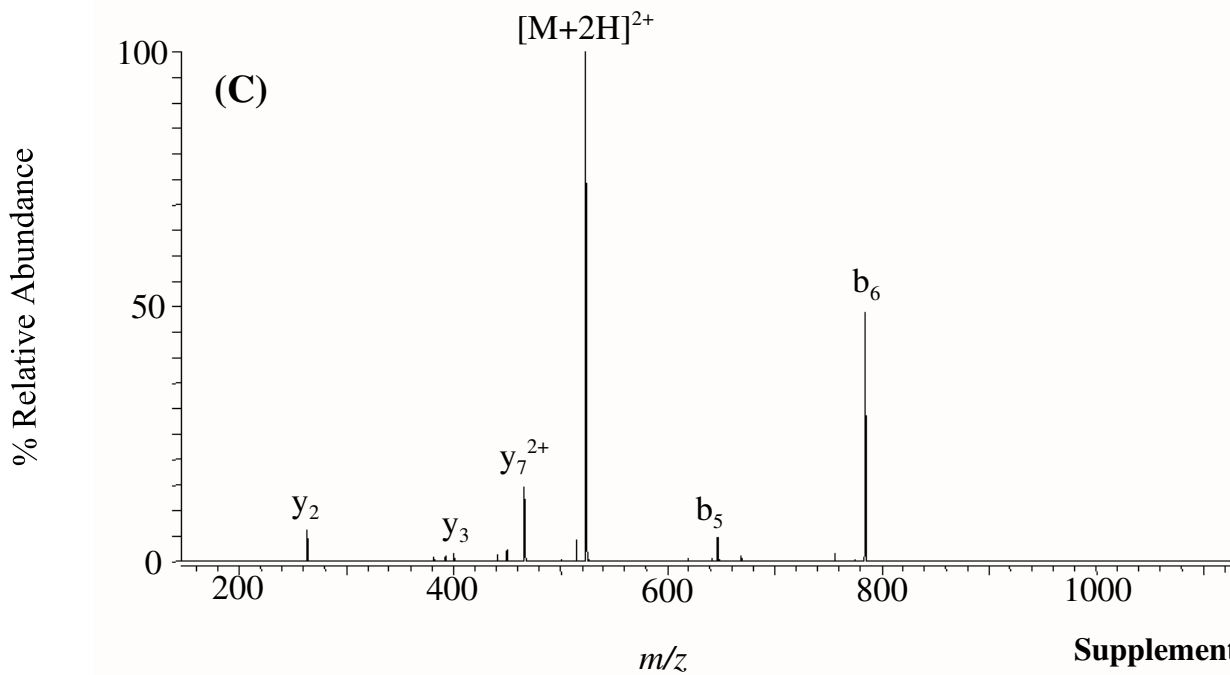

**DRVYIHPFHL**

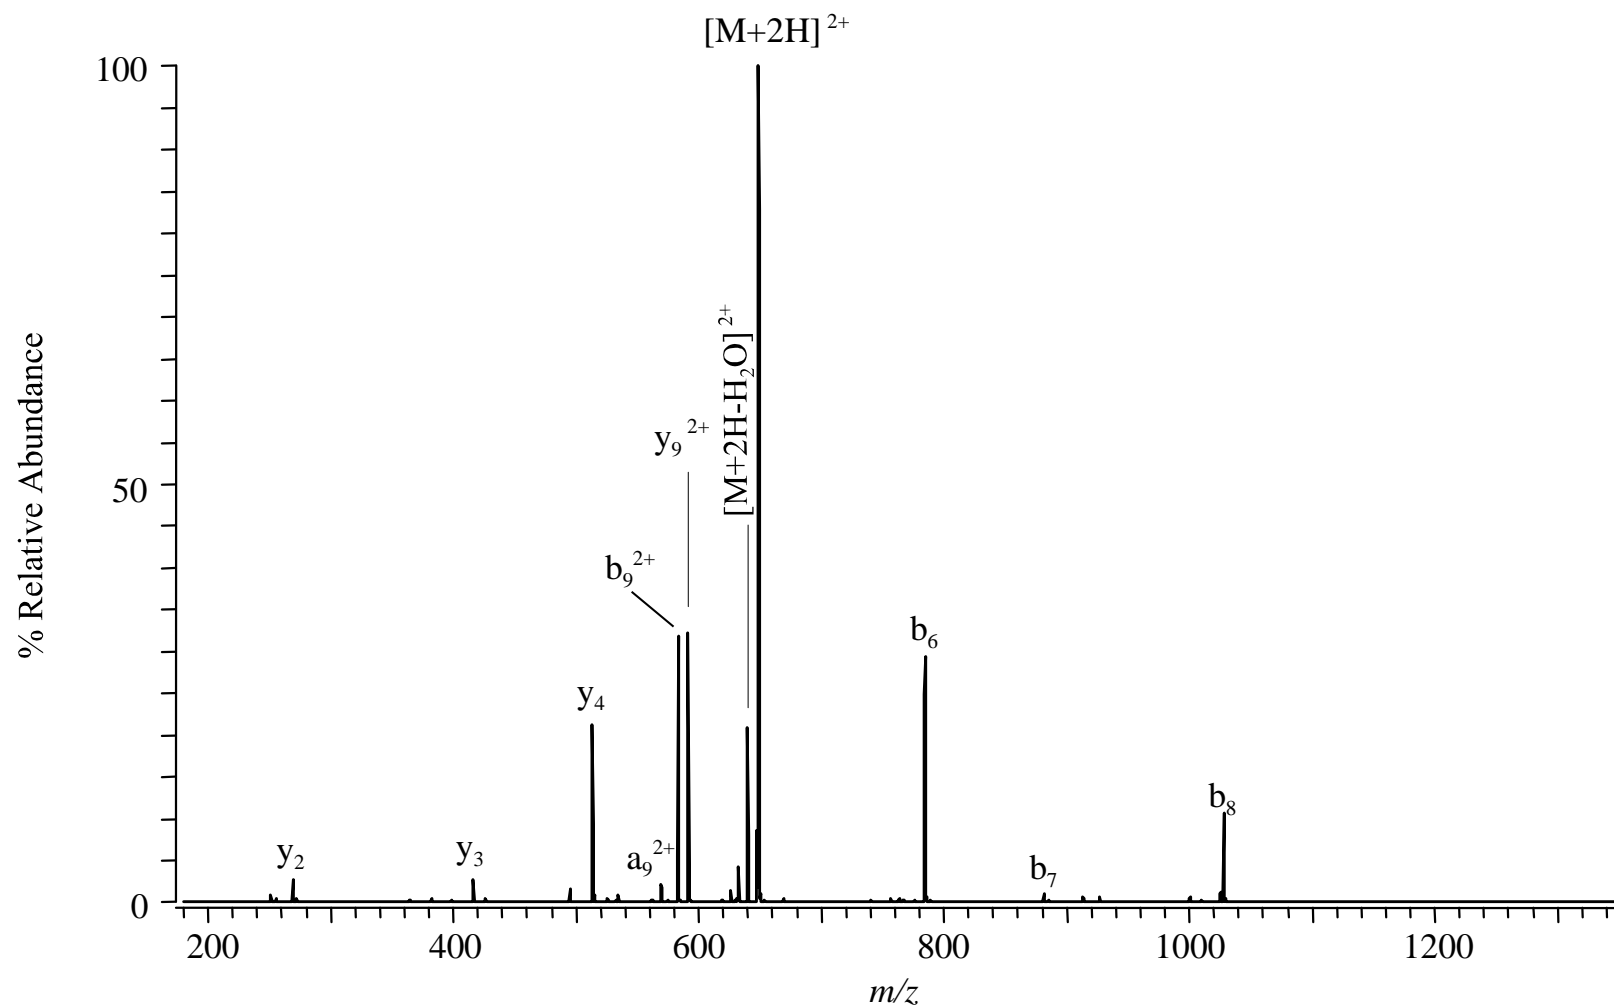

Supplemental Figure 3

# VYIHPF

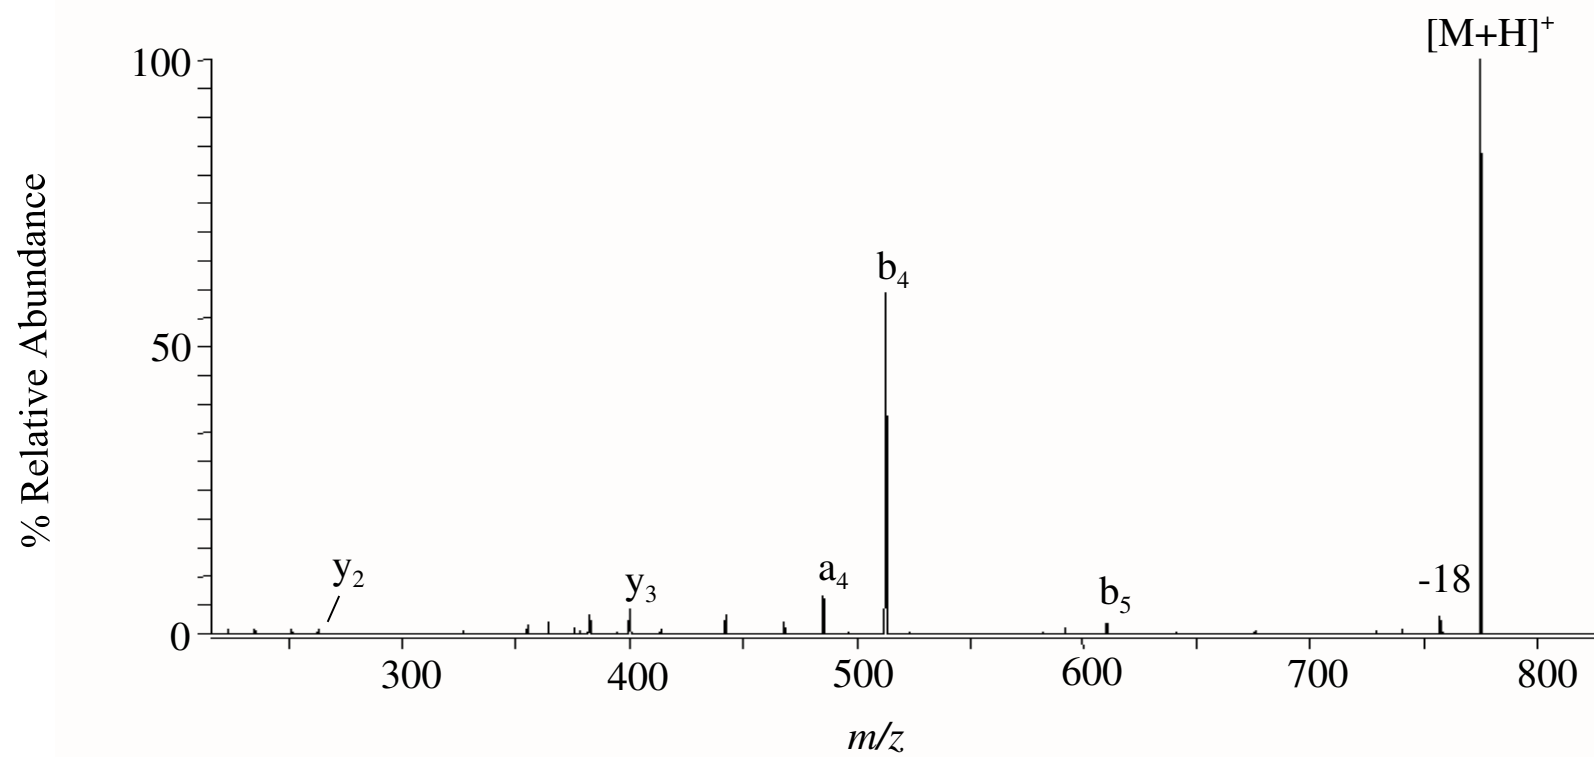

Supplemental Figure 4

**A A H A A**

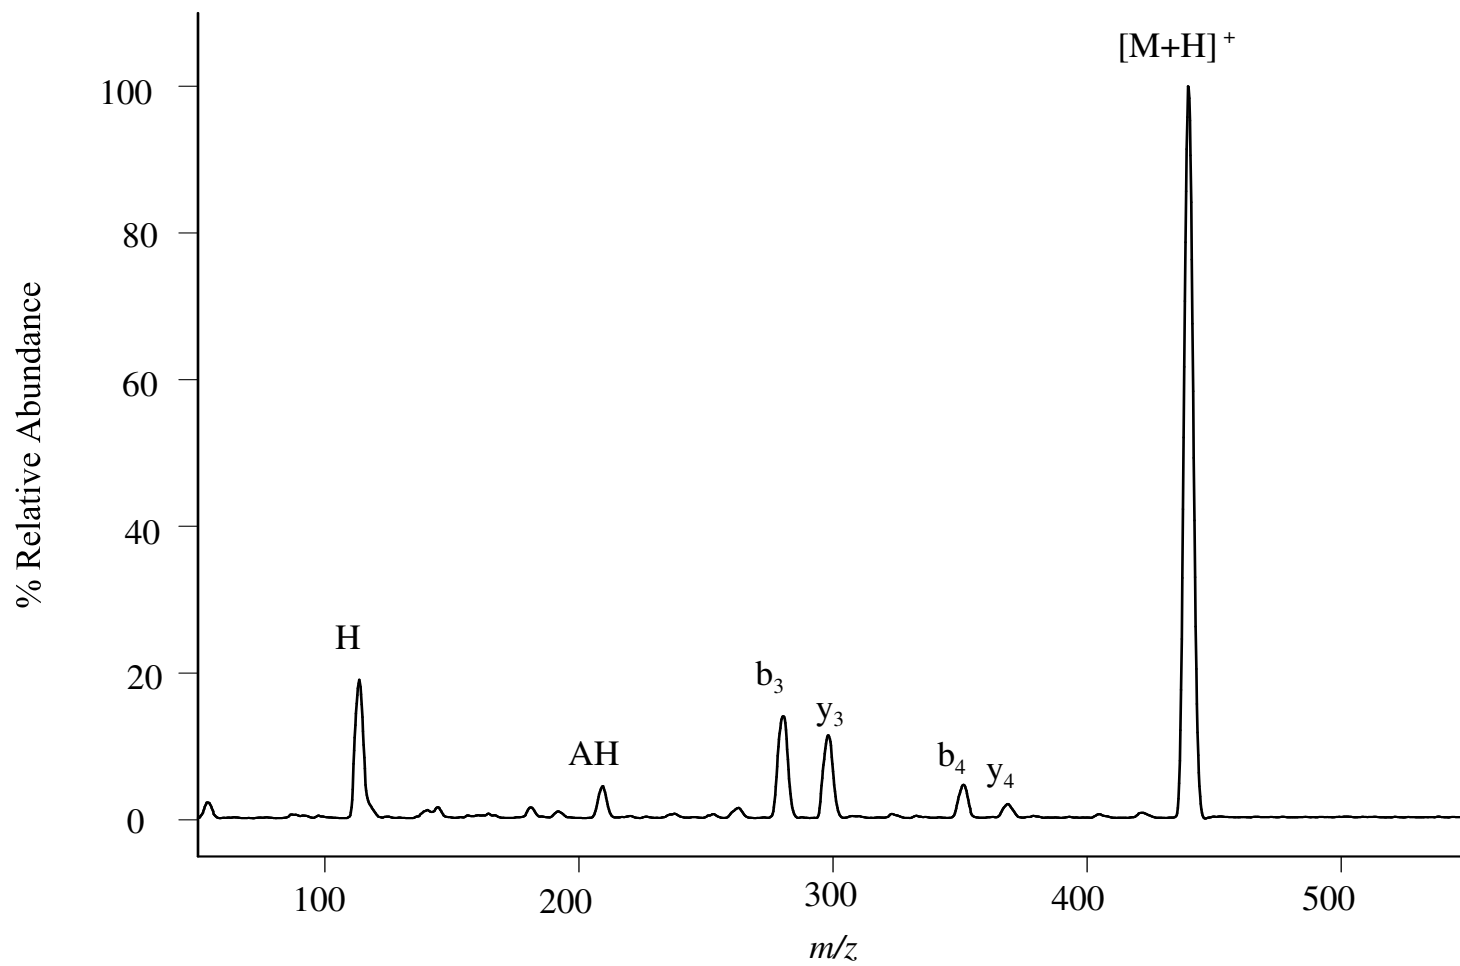

**Supplemental Figure 5**

**A A A A A H A A**

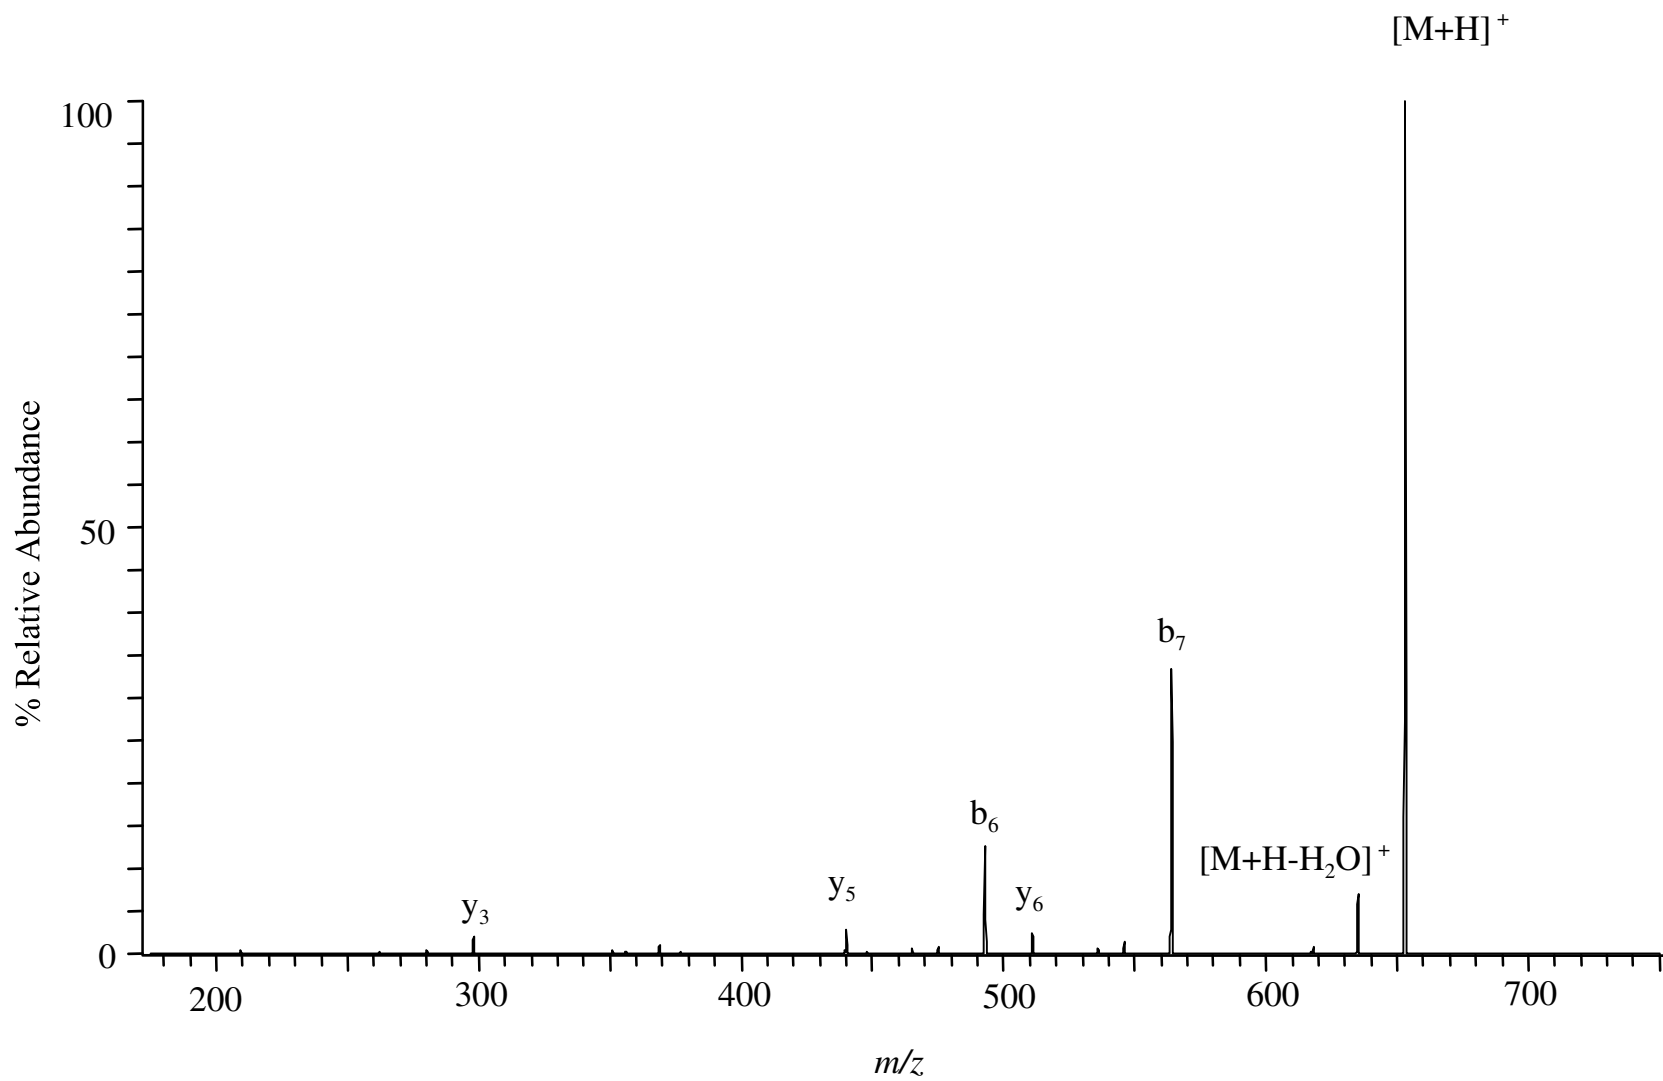

**Supplemental Figure 6**

# R V Y I H P F

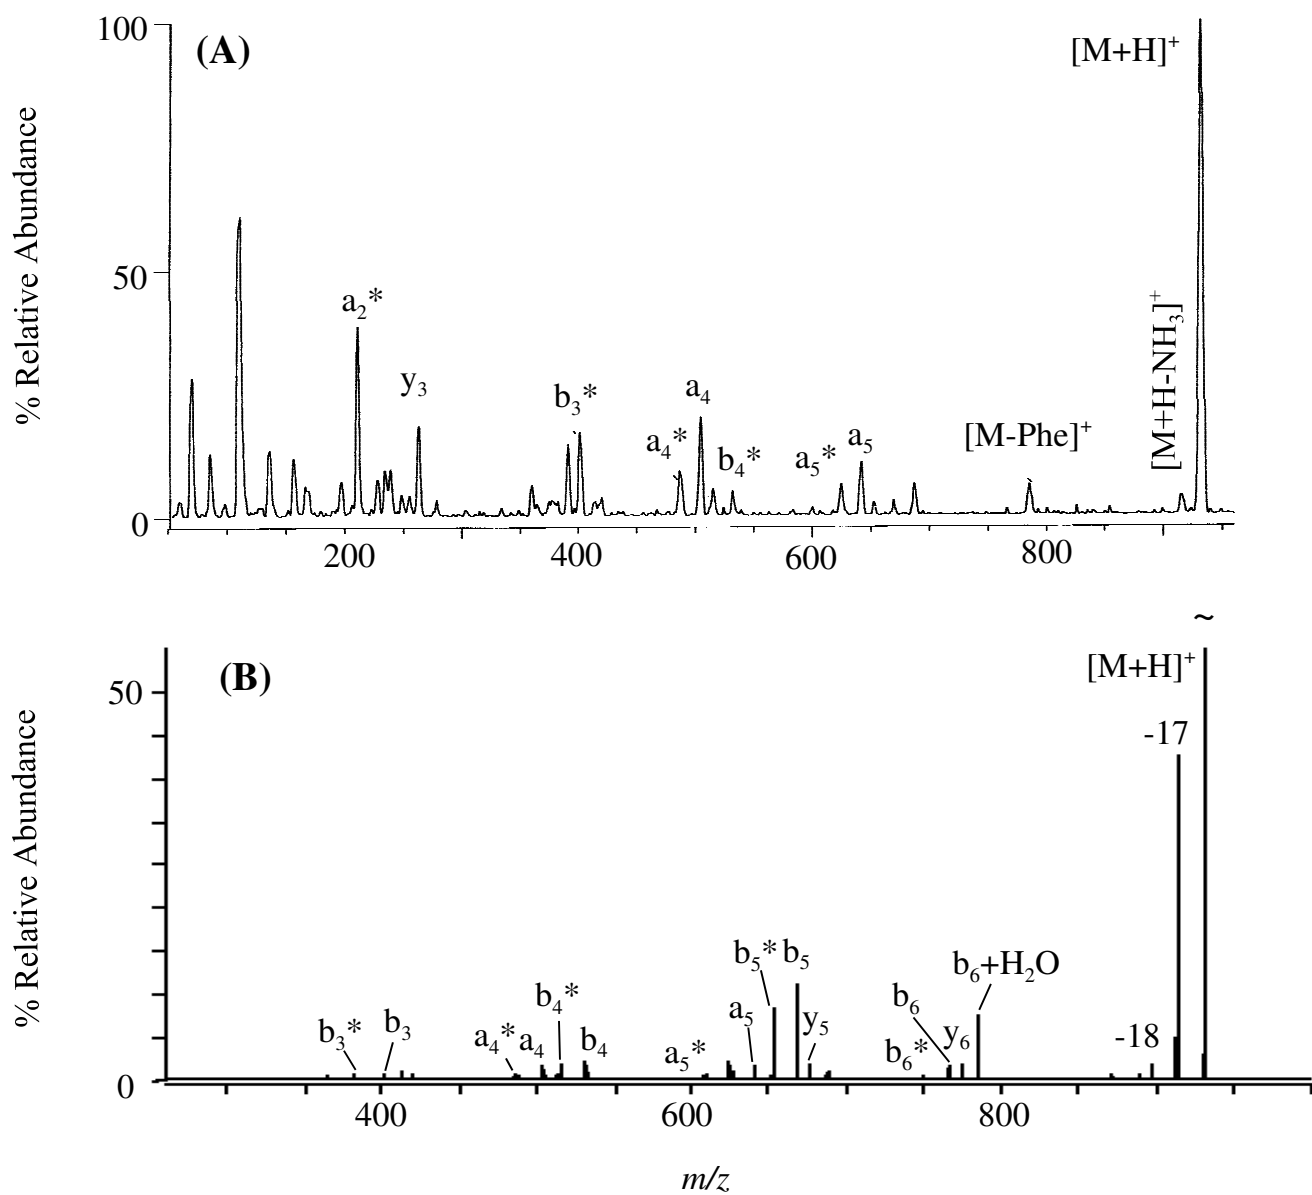

# DRVYIHPF

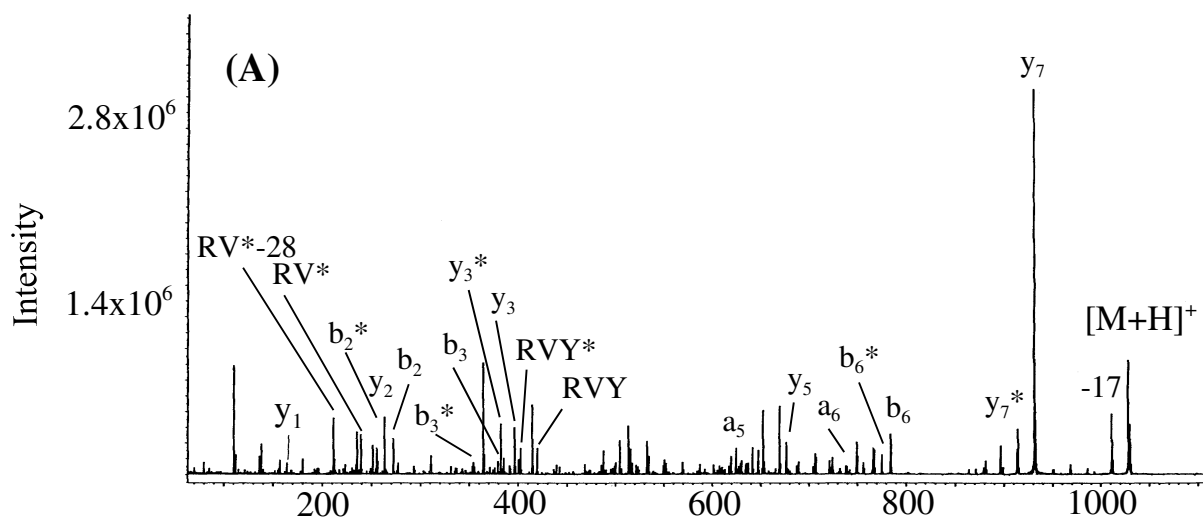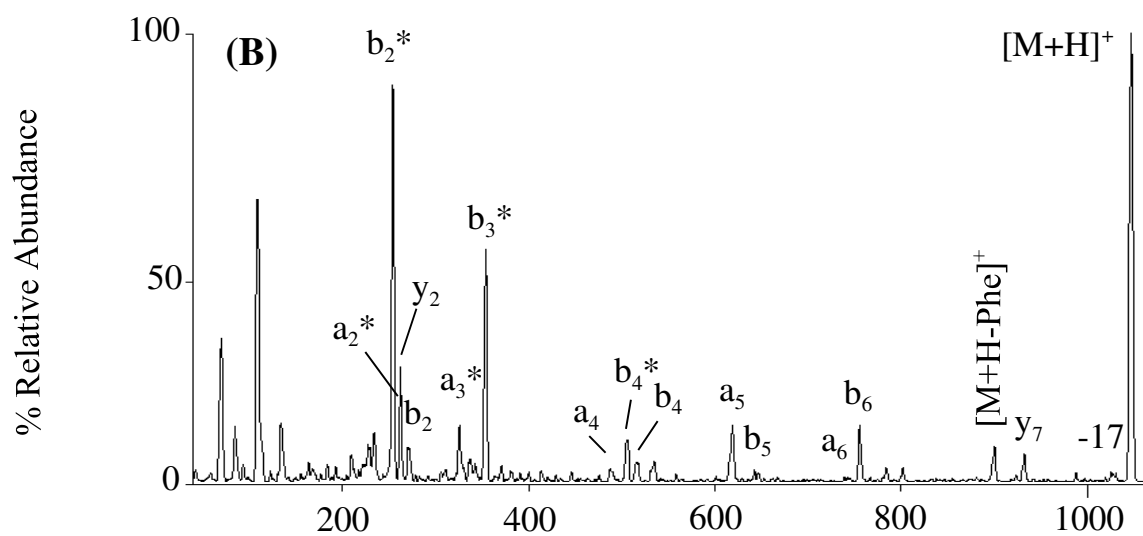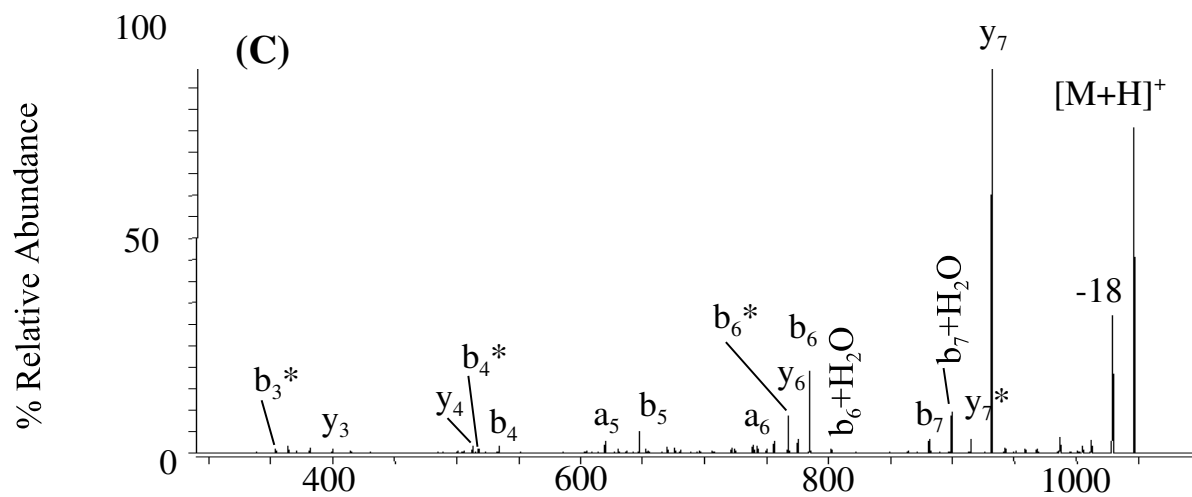

$m/z$



**DRVYIHPFHL**

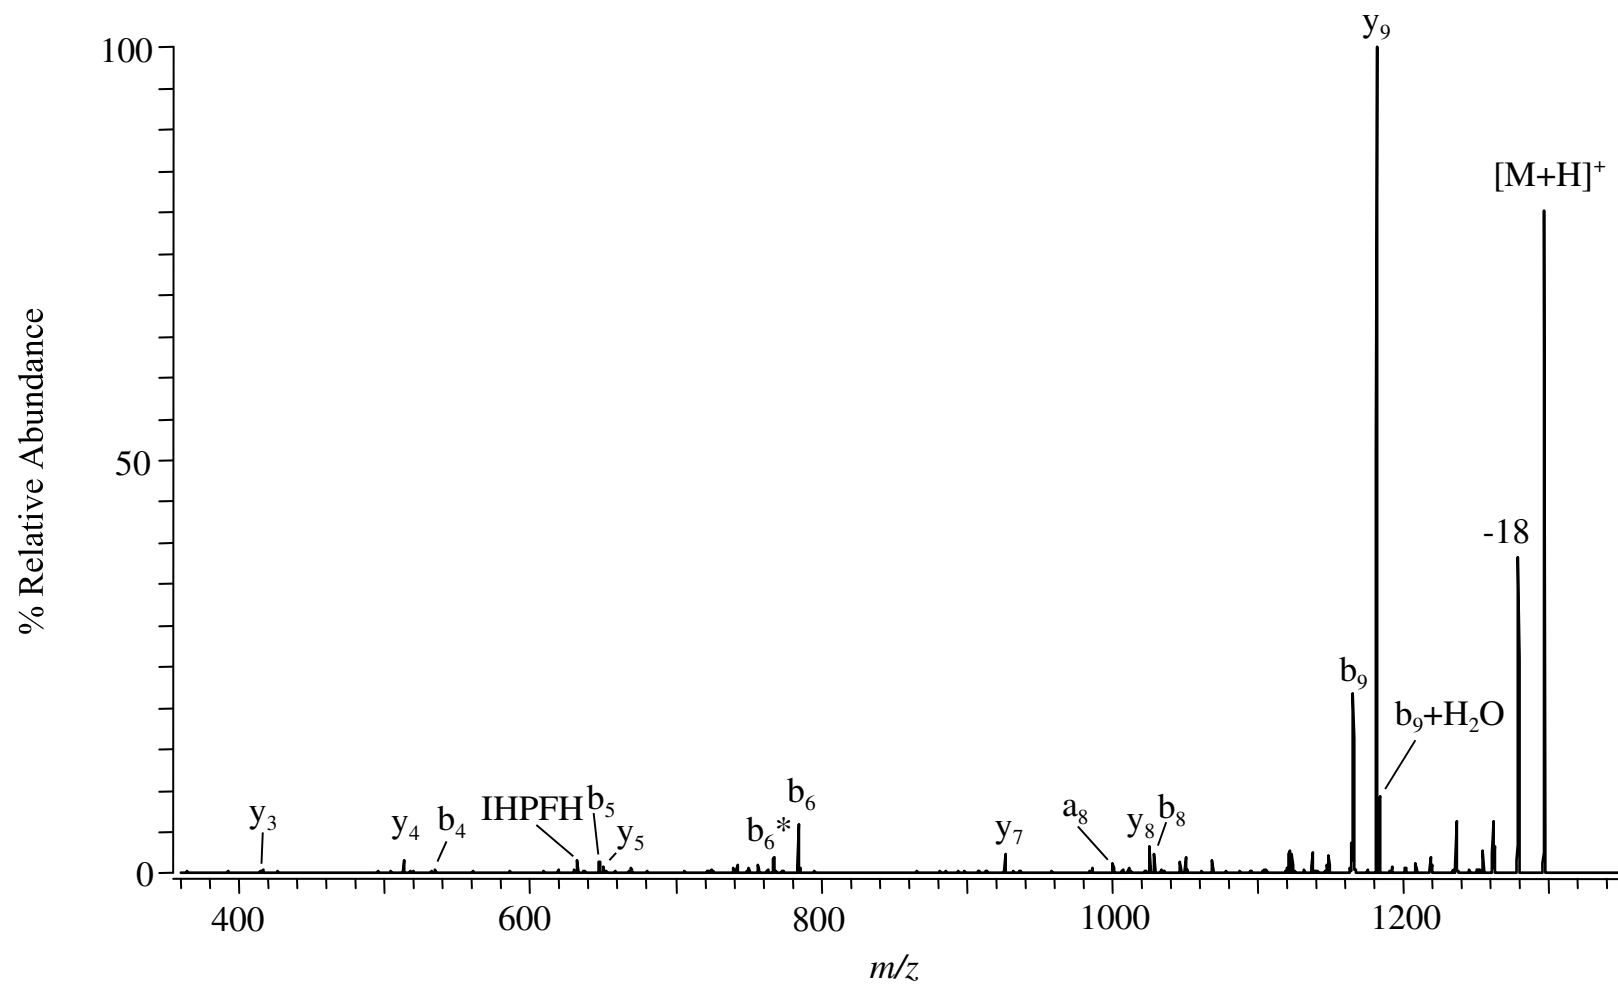

Supplemental Figure 9

# R V Y I F P F

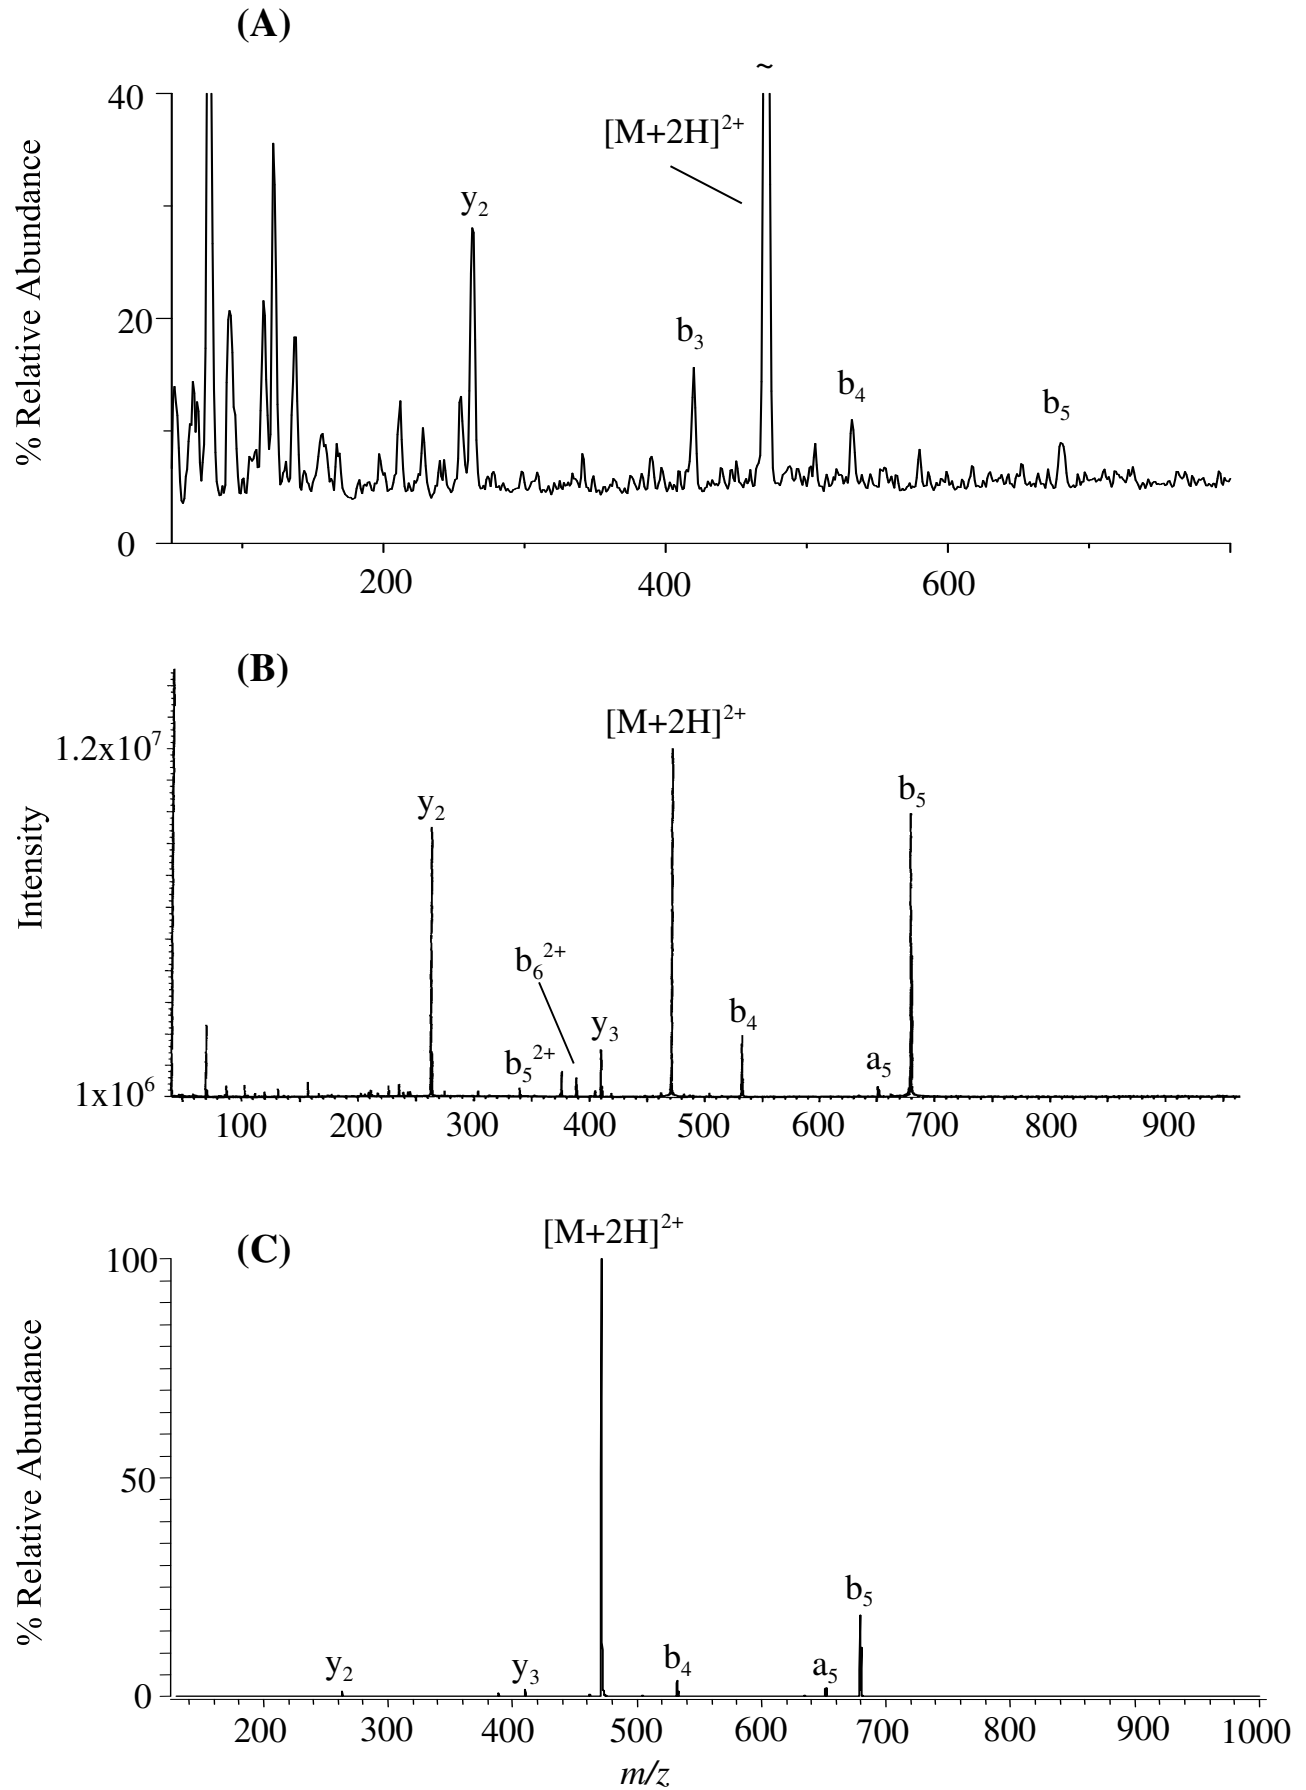

# VYIFPF

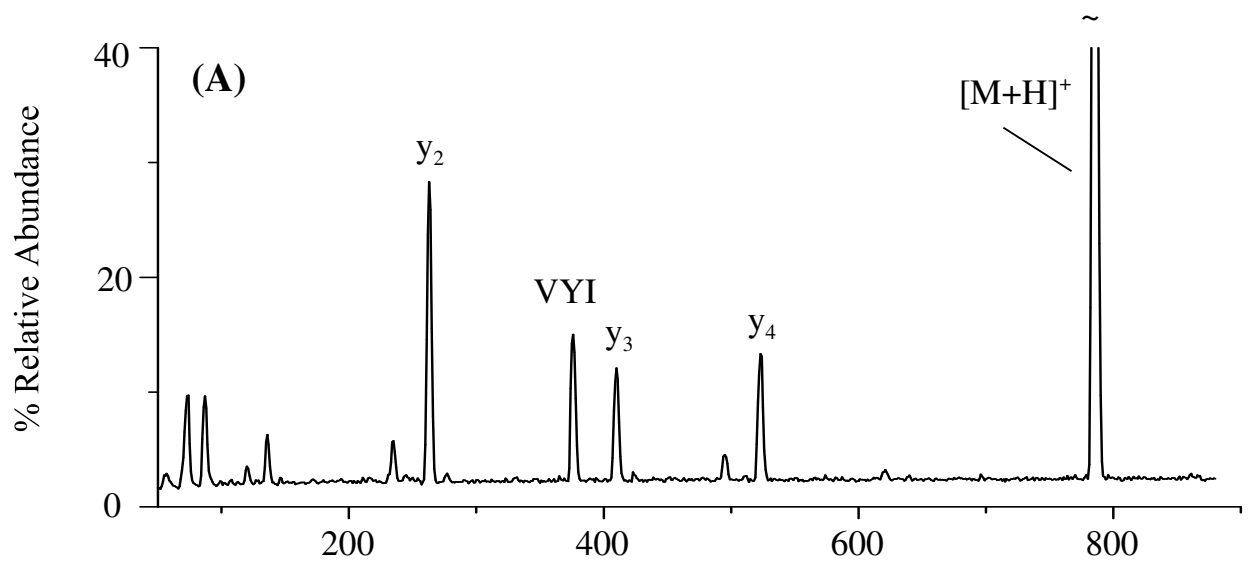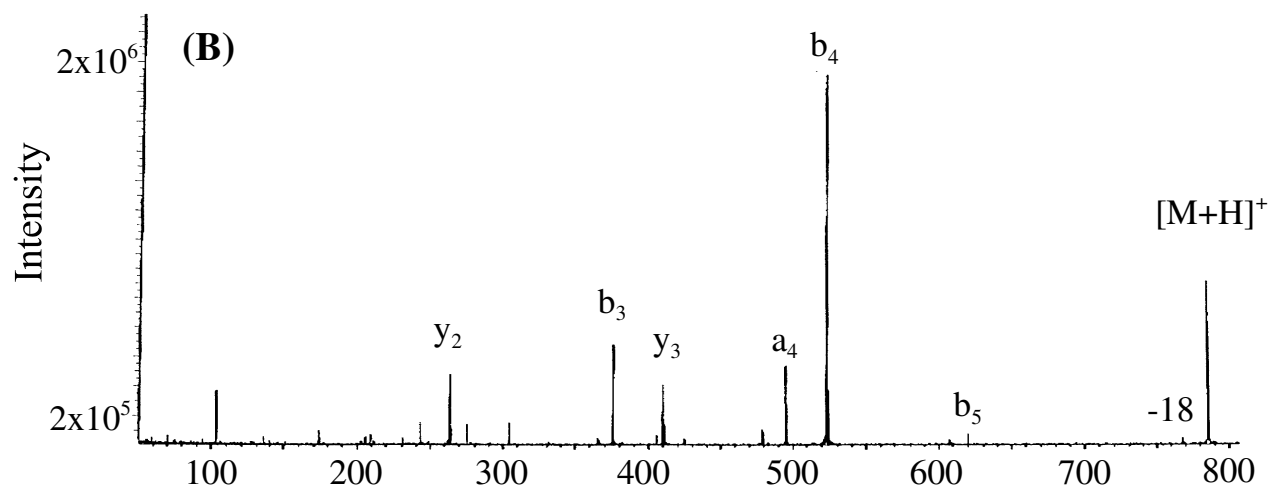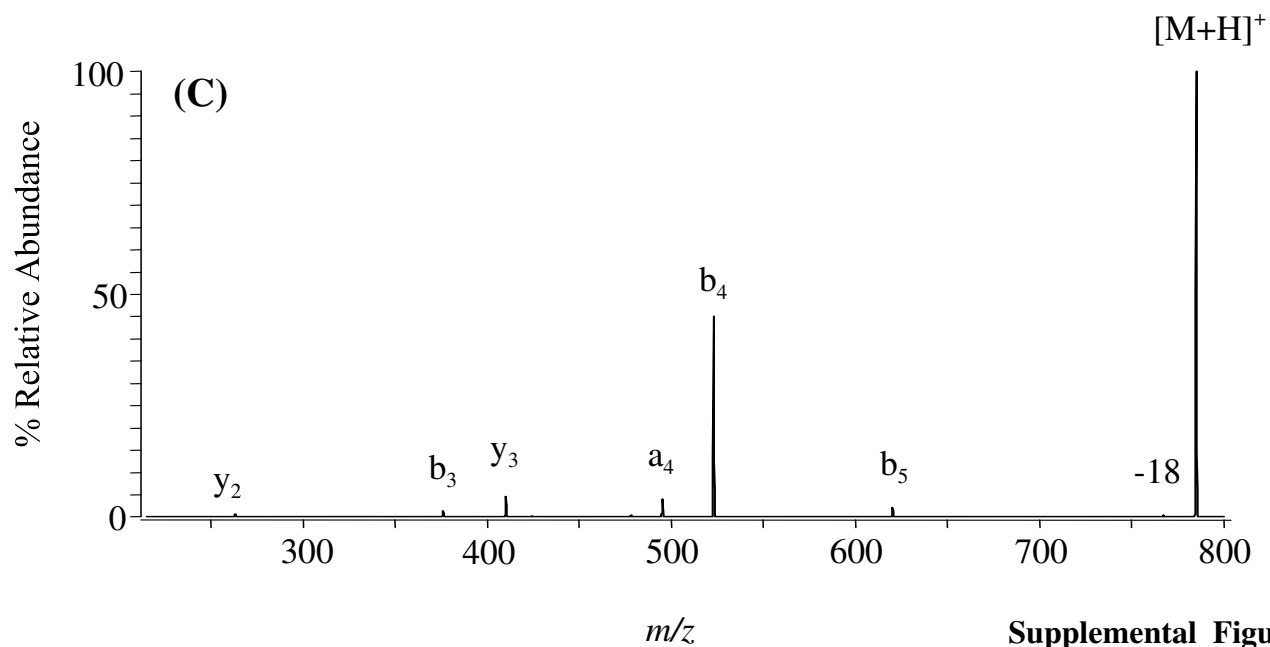

# R V Y I F A F

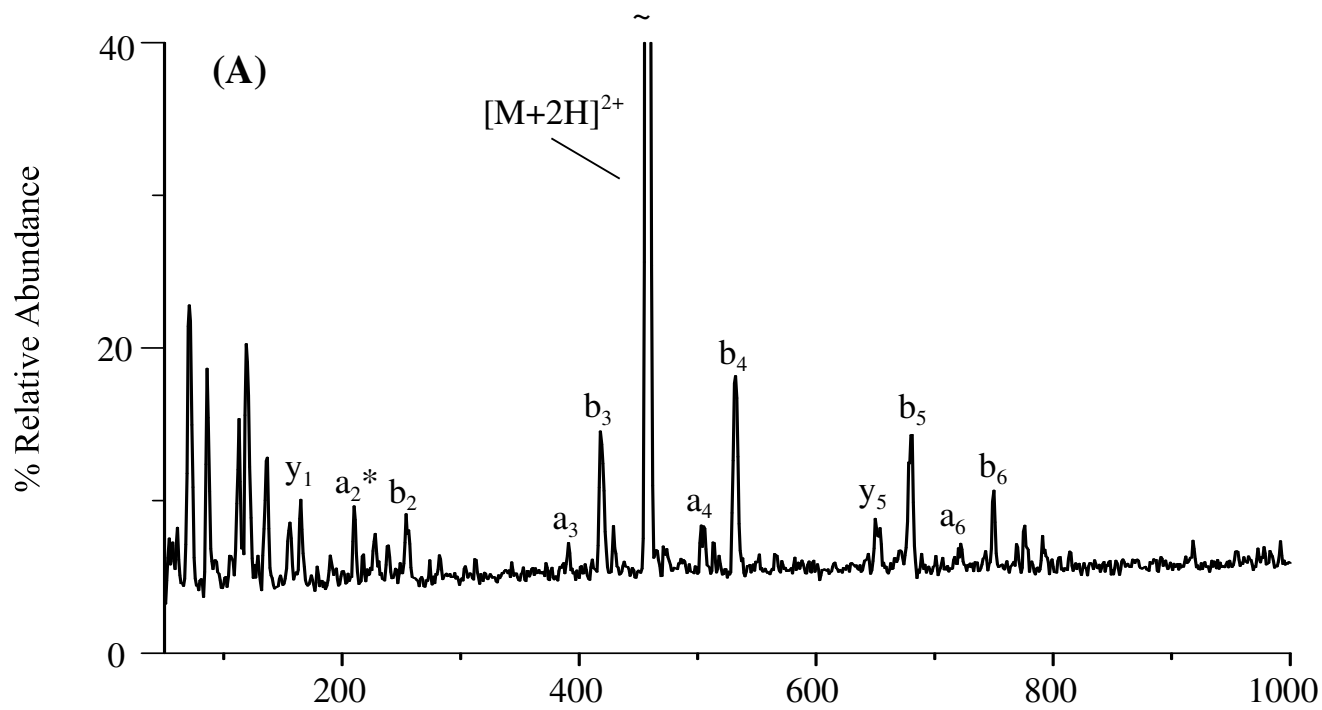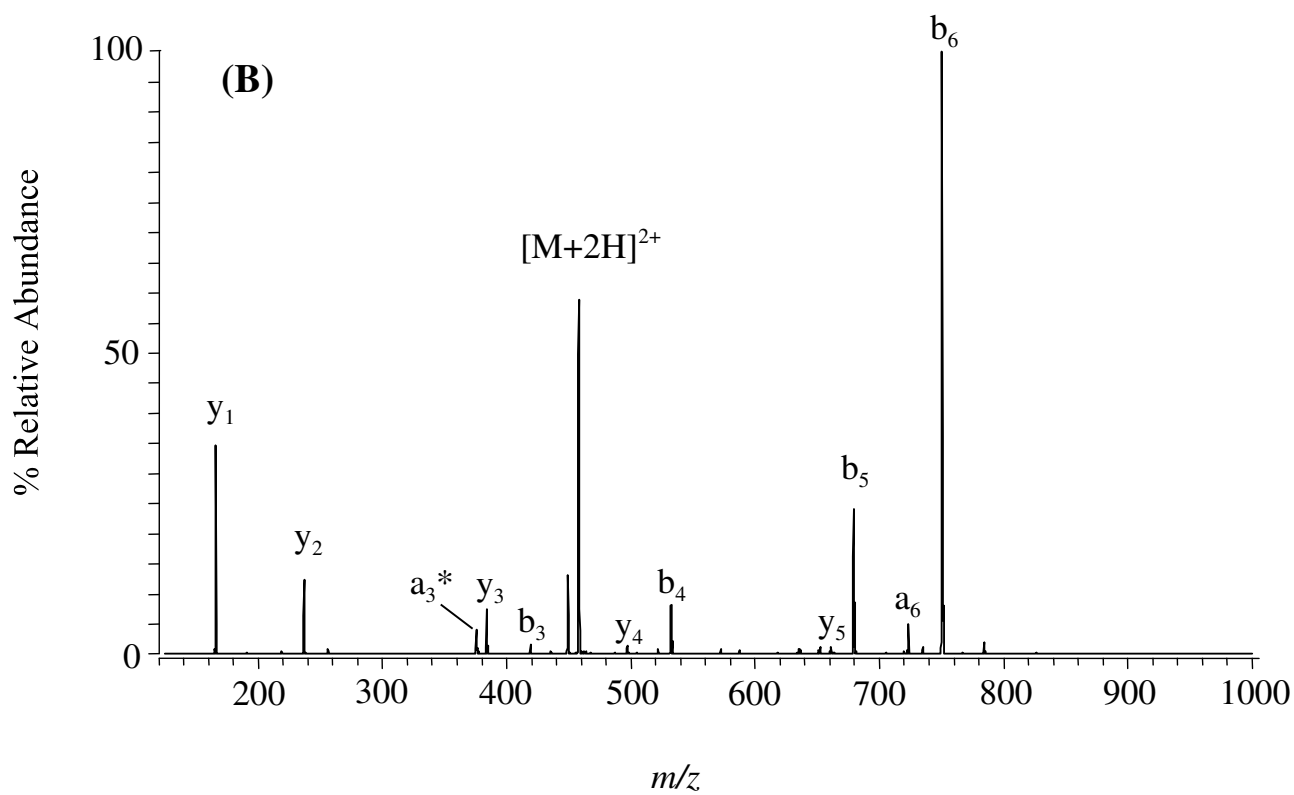

# VYIFAF

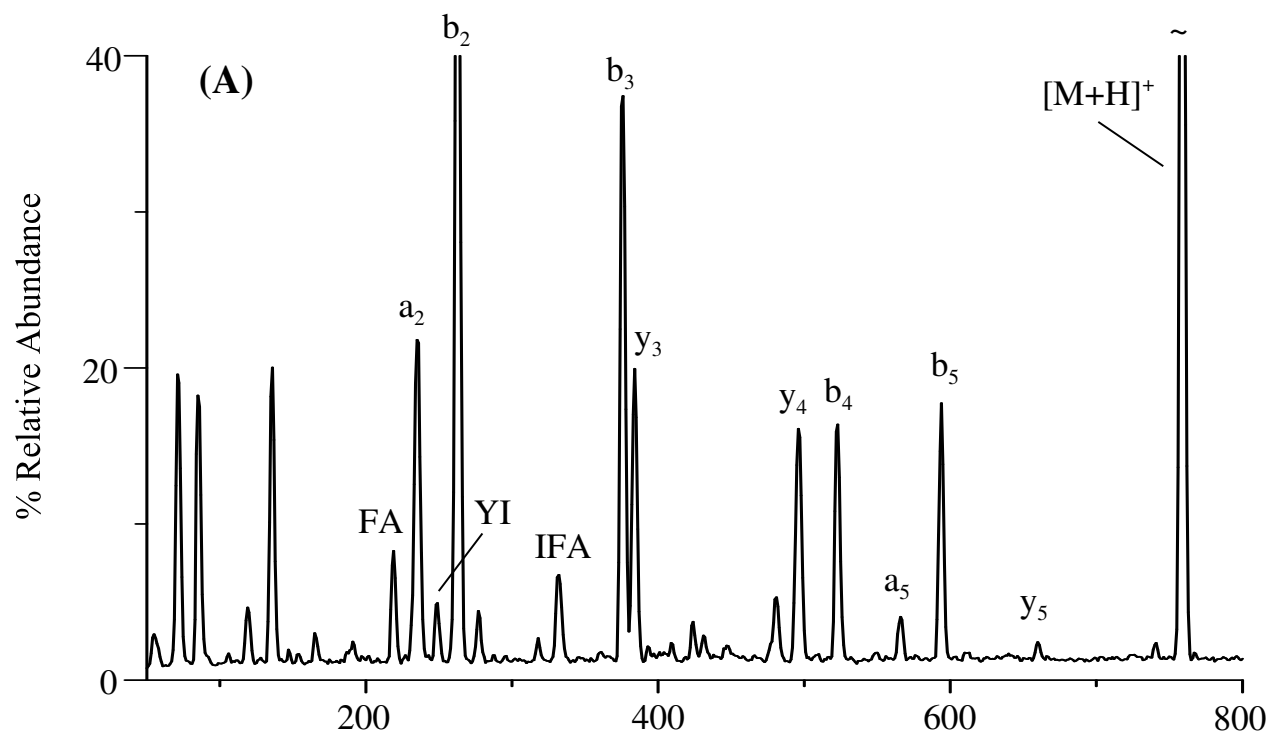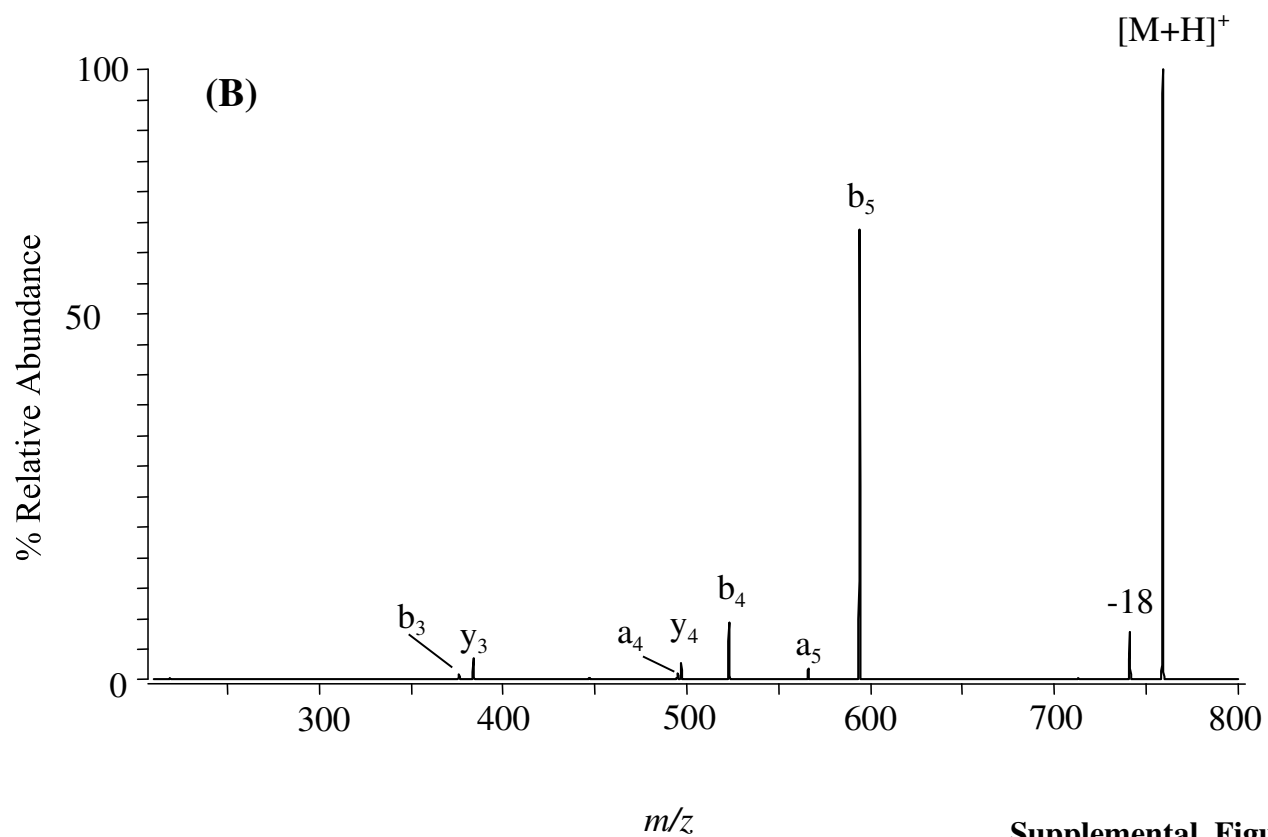

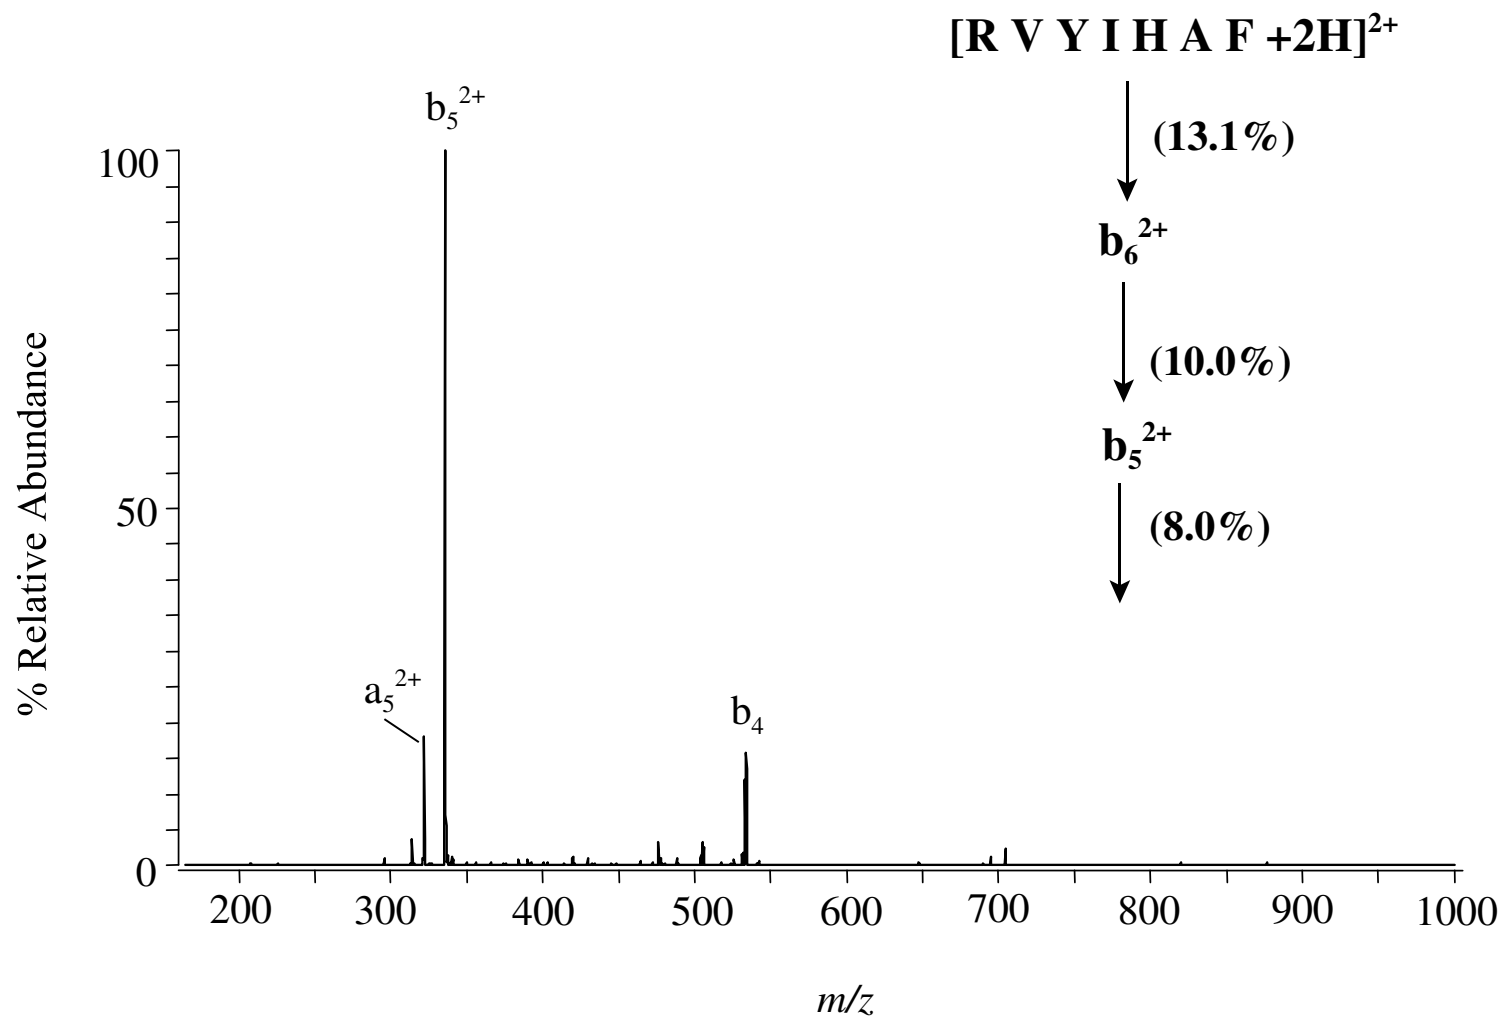

Supplemental Figure 14
